# Supplementary material for: Blast-Derived Small Extracellular Vesicles in the Plasma of Patients with Acute Myeloid Leukemia Predict Responses to Chemotherapy
Source: MDPI journal article supplement (doi:10.3390/biomedicines11123236), 2023-12-07
Supplement: s1 [file s1]

## Supplemental Figure S1

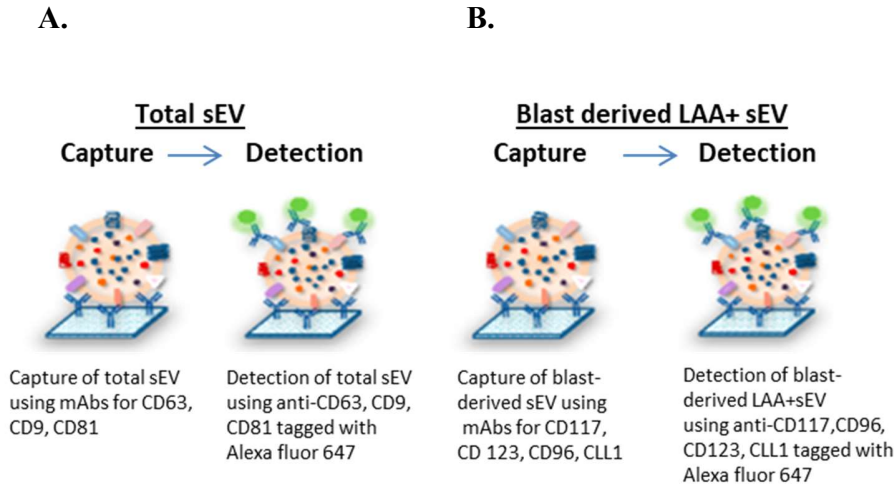

**Supplemental Figure S1. Schematic for microarray-based immune capture and detection of plasma-derived sEV. (A)** Total sEV are captured by a mix of bioprinted tetraspanin-specific mAbs (CD63, CD9, and CD81). The detection of total sEV is accomplished with fluorescently labeled anti-tetraspanin mAbs. **(B)** A cocktail of four bioprinted mAbs recognizing LAAs (CD117, CD123, CD96, and CLL1) is used for the capture of blast-derived LAA<sup>+</sup> sEV. Detection of LAA<sup>+</sup> sEV is accomplished with fluorescently labeled anti-tetraspanin mAbs. The A and B microarrays are tested in parallel to assess the relative fluorescence intensity (RFI) of each sample. Data obtained from the A and B microarrays are used to calculate the LAA<sup>+</sup>/total sEV ratio in each sample.

## Supplemental Figure S2.

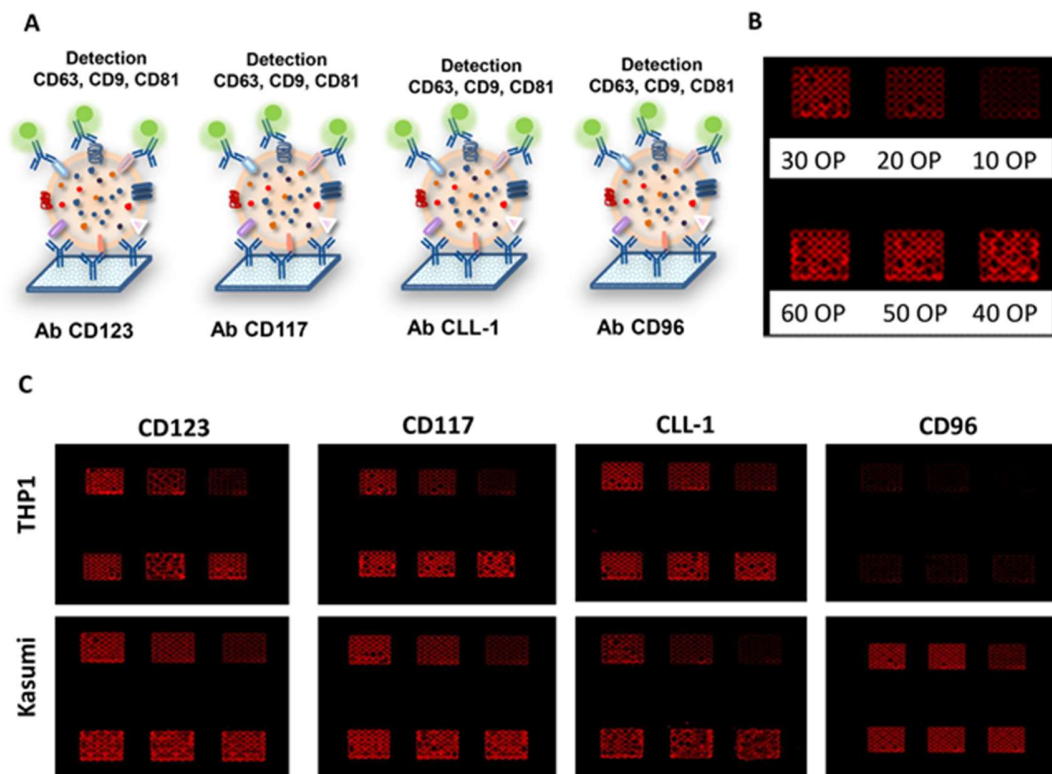

**Supplemental Figure S2. Titrations of mABs for immunocapture.** In **A**, the schema for titrations of *individual* anti-LAA mAbs used for the capture and detection of LAA<sup>+</sup> sEV. The mAbs specific for these LAAs were deposited on microarrays and used for establishing optimal Ab dilutions. In **B**, arrays were printed with increasing doses of mAb, as indicated by the numbers of the applied overprints (OP), which ranged from 10 to 60 OPs. In **C**, real-life images of the microarrays illustrate dilutions of mAbs (OPs #) that are optimal for sEV capture from THP-1 (monocytic cell line) or Kasumi (leukemia cell line) supernatants.

**Supplemental Figure S3.**

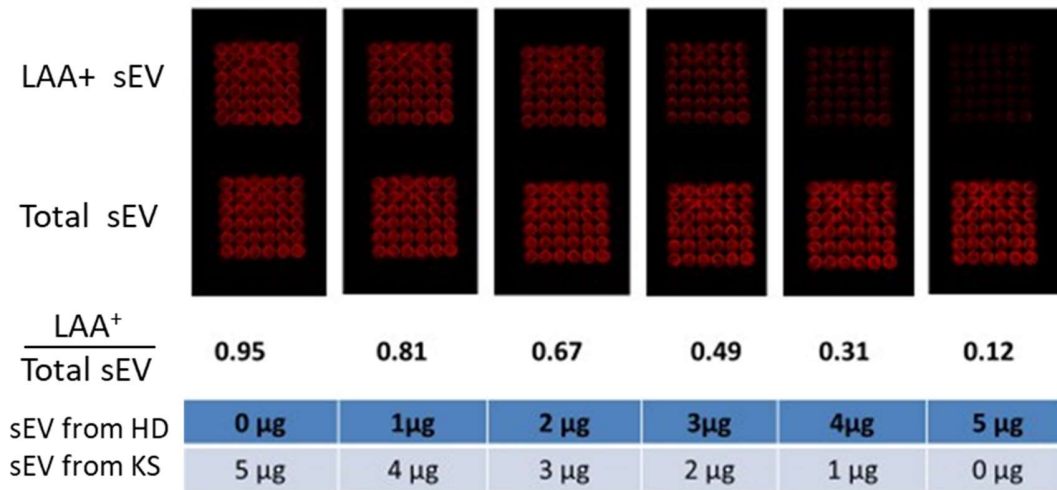

**Supplemental Figure S3. Quantitation and detection of LAA<sup>+</sup> and total sEV – spiking experiments.** sEV isolated from the plasma of healthy donors (HDs) were mixed with sEV isolated from Kasumi cells (KS) at increasing/decreasing concentrations. Mixed sEV were plated in microwells and immunocaptured with respective mAbs, as illustrated in Supplemental Figure 1, and confocal microscopy was used for the detection of LAA<sup>+</sup> sEV (upper row) and total plasma sEV (lower row). The LAA<sup>+</sup>/total sEV ratios were calculated and are shown below the microarray. The ratios decreased as the concentrations of LAA<sup>+</sup> sEV (from Kasumi cells) decreased. As expected, HDs sEV gave only a minimal detection signal for LAAs at a ratio of 0.12.

**Supplemental Figure S4.**

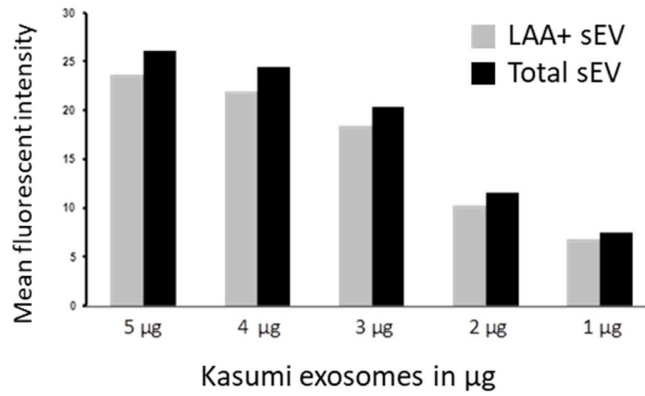

**Supplemental Figure S4. Microarray assay: sensitivity of detection.** The sensitivity of detection was determined by testing decreasing concentrations (5 µg/mL – 1 µg/mL) of Kasumi sEV and measuring the detectable signal (mean fluorescent intensity, MFI). At 1 µg/mL Kasumi sEV, the MFI was 6, indicating that the lower limit of detection of the microarray is 1 µg total sEV protein.

**Supplemental Figure S5.**

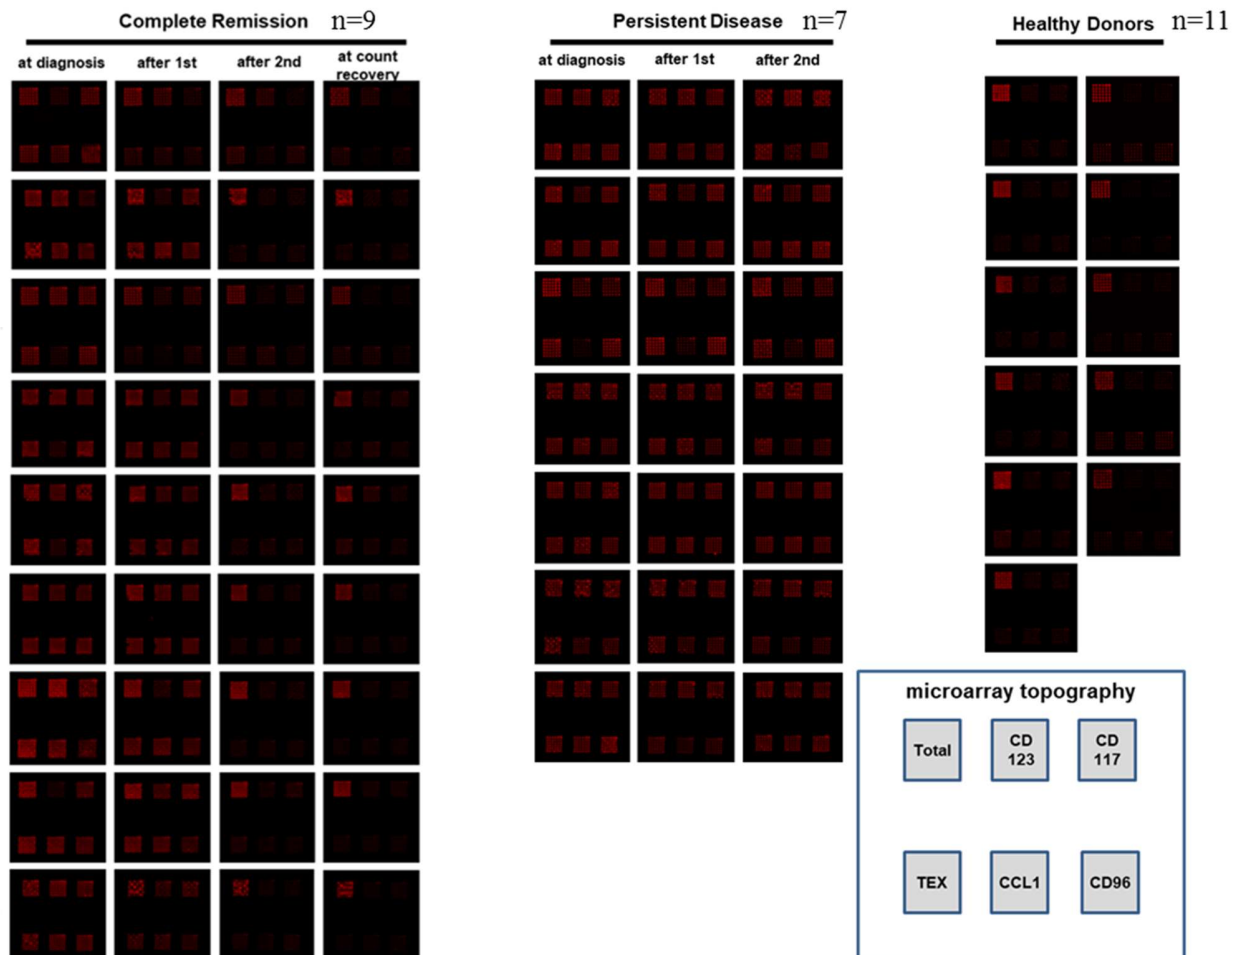

**Supplemental Figure S5. Microarray-based immune capture and detection of sEV in plasma from AML patients and healthy donors.** The schema (right) shows the microarray topography for each square and the capture of total or LAA<sup>+</sup> sEV by the indicated individual monoclonal antibodies (mAbs) bioprinted on the array (right 4 squares), total sEV (cocktail of anti-CD63, anti-CD9, and anti-CD81mAbs), and LAA<sup>+</sup> sEV (cocktail of anti-CD123, anti-

CD117, anti-CLL-1, and anti-CD96). Scans of the microarrays are shown for the 16 patients (9 who achieved CR and 7 with PD) and 11 HDs. In patients who achieved CR, there was a decrease in the LAA<sup>+</sup>/total ratios after each cycle of therapy; the ratios of LAA<sup>+</sup>/total plasma sEV remained elevated even after 2 cycles of induction chemotherapy in those with PD. Note that in HD's samples, only total sEV squares are positive. The figure also shows that the use of high-affinity mAbs specific for four different LAAs overexpressed on leukemic blasts (CD123, CD117, CLL-1, and CD96) increases the sensitivity of the assay for LAA<sup>+</sup> sEV.
